# Supplementary material for: Hemolysin Co-Regulatory Protein 1 Enhances the Virulence of Clinically Isolated Escherichia coli in KM Mice by Increasing Inflammation and Inducing Pyroptosis
Source: MDPI journal article supplement (doi:10.3390/toxins15030171), 2023-02-22
Supplement: s1 [file s1]

Article

# Hemolysin Co-Regulatory Protein 1 Enhances the Virulence of Clinically Isolated *Escherichia coli* in KM Mice by Increasing Inflammation and Inducing Pyroptosis

Hao Wang, Long-bao Lv, Li-ping Chen, Jin-long Xiao, Jue Shen, Bin Gao, Jin-gang Zhao, Dong-mei Han, Bin-xun Chen, Shuai Wang, Gen Liu, Ai-guo Xin, Peng Xiao and Hong Gao

A ttgacagctagctcagctcaggtataataactagtNNNNNNNNNNNNNNNNNNNNNNNNGTTTTAGAGCTAGAAAT  
AGCAAGTTAAAATAAGGCTAGTCCGTTATCAACTTGAAAAAGTGGCACCGAGTCGGTG  
B CTTTTTTT

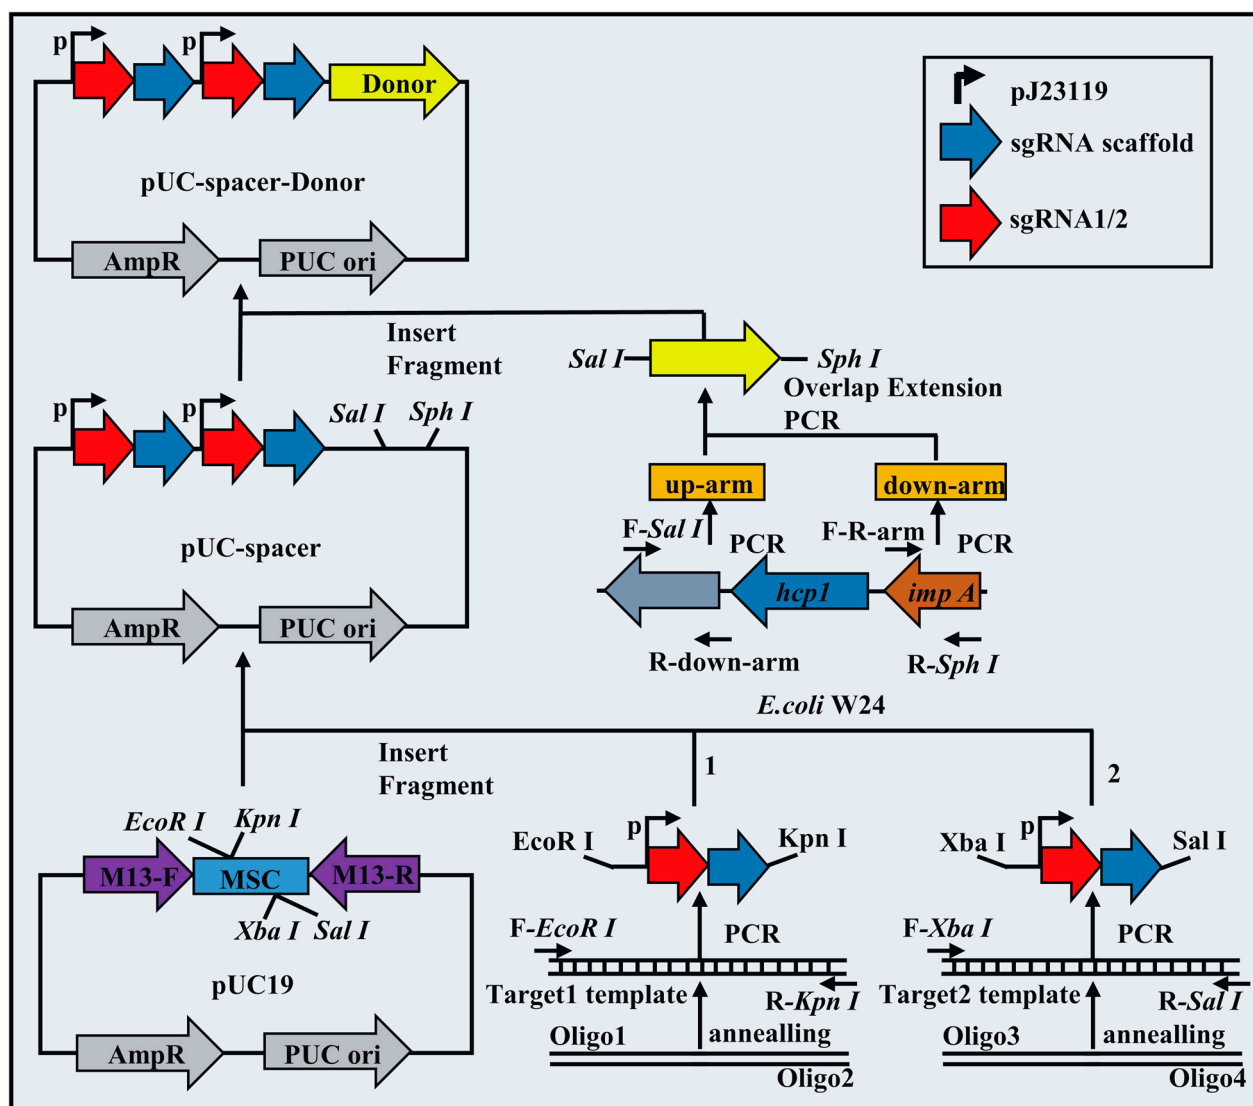

**Figure S1.** sgRNA expression cassette and plasmid construction process. (A). sgRNA expression cassette. (B). Plasmid construction process.

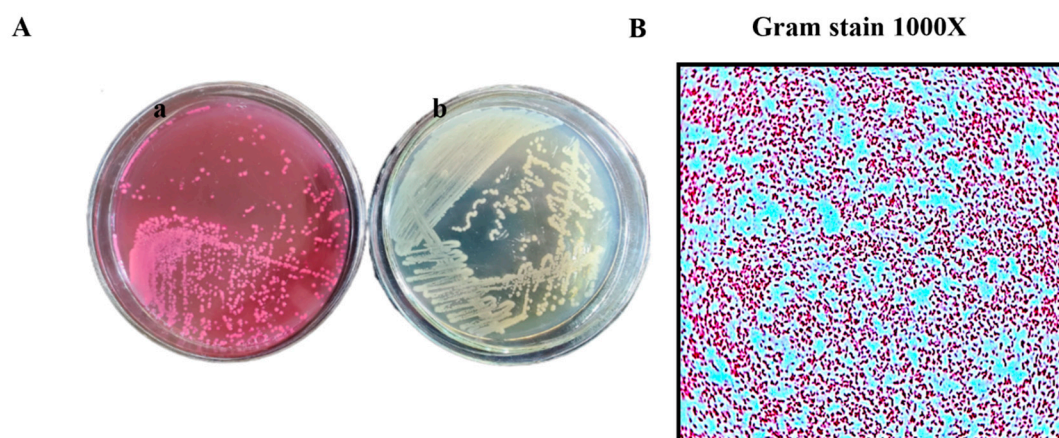

**Figure S2.** Clinical isolation of *E. coli*. **(A).** a. *E. coli* is grown on MacConkey medium, b. *E. coli* is grown on LB medium. **(B).** Gram staining of *E. coli*.

**Table S1.** Strains and plasmids used in this study.

| Strain or plasmid        | Characteristic(s)                                                                                                                                                                                                                                                  | Source           |
|--------------------------|--------------------------------------------------------------------------------------------------------------------------------------------------------------------------------------------------------------------------------------------------------------------|------------------|
| <b>Strains</b>           |                                                                                                                                                                                                                                                                    |                  |
| W24                      | A clinical isolate from the faeces of a piglet with diarrhea; EPEC                                                                                                                                                                                                 | laboratory stock |
| DH5 $\alpha$             | F <sup>-</sup> , $\phi$ 80dlacZ $\Delta$ M15, $\Delta$ (lacZYA-argF)U169, <i>deoR</i> , <i>recA1</i> , <i>endA1</i> , <i>hsdR17</i> ( $\text{r}^{-}$ , $\text{m}^{-}$ ), <i>phoA</i> , <i>supE44</i> , $\lambda^{-}$ , <i>thi-1</i> , <i>gyrA96</i> , <i>relA1</i> | TaKaRa           |
| W24 $\Delta$ <i>hcp1</i> | W24 mutant with <i>hcp1</i> deletion                                                                                                                                                                                                                               | This study       |
| <b>Plasmids</b>          |                                                                                                                                                                                                                                                                    |                  |
| pUC19                    | Amp <sup>r</sup> , pMBI origin, DNA sequencing using M13 series primers                                                                                                                                                                                            | TaKaRa           |
| pCas                     | Kan <sup>r</sup> , ParaBAD- $\lambda$ -Red recombinase, Pcas-cas9, Ptrc-pMBI-sgRNA, pSC101ts origin                                                                                                                                                                | laboratory stock |
| pUC-spacer-Donor         | Based on pUC19 skeleton, sgRNA1-Hcp1, sgRNA2-Hcp1, Donor                                                                                                                                                                                                           | This study       |

**Table S2.** Primers used for the PCR amplification.

| Primers                    | Primer sequences                                                                        |
|----------------------------|-----------------------------------------------------------------------------------------|
| up-arm-F-<br><i>Sal I</i>  | ACGCGTCGACA ACTAACCAGGCGAGTGTAT                                                         |
| up-arm -R                  | GCCAGAGGCGGCAACCGGTACTTACTGTAATAACATAATA                                                |
| down-arm-F                 | TATTATGTTATTACAGTAAGTACCGGTTGCCGCCTCTGGC                                                |
| down-arm-R<br><i>Sph I</i> | ACATGCATGCCAGCAACAGGCCTCGACACAATG                                                       |
| Oligo1-F                   | tcctaggtataataactagtGAATGCAATGAGTAAATGGCGTTTTAGAGCTAGAAATAGCAAGTTAAAATAA<br>GGCTAGTCCGT |
| Oligo1-R                   | ACGGACTAGCCTTATTTTAACTTGCTATTTCTAGCTCTAAAACGCCATTTACTCATTGCATTCactag<br>tattatacctagga  |
| Oligo2-F                   | tcctaggtataataactagtATAAAGGCAATTCTCTCTGGTTTTAGAGCTAGAAATAGCAAGTTAAAATAA<br>GGCTAGTCCGT  |
| Oligo2-R                   | ACGGACTAGCCTTATTTTAACTTGCTATTTCTAGCTCTAAAACAGGAGAGAATTGCCTTTATact<br>gtattatacctagga    |
| F- <i>EcoR I</i>           | CCGGAATTCTtgacagctagctcagtcctaggtataataactagt                                           |
| R- <i>Kpn I</i>            | CGGGGTACCAAAAAAAGCACCGACTCGGTGCCACTTTTTCAAGTTGATAACGGACTAGCCTTATT<br>TA                 |
| F- <i>Xba I</i>            | CTAGTCTAGAttcttgacagctagctcagtcctaggtataataactagt                                       |

|                 |                                                                 |
|-----------------|-----------------------------------------------------------------|
| R- <i>Sal I</i> | ACGCGTCGACAAAAAAGCACCGACTCGGTGCCACTTTTTCAAGTTGATAACGGACTAGCCTTA |
|                 | TTTA                                                            |
| pCas-JD-F       | TCCGCCTGTCTGTACTTCTG                                            |
| pCas-JD-R       | CGTCGTTGGAAGTCTTTGA                                             |
| M13-F           | GTAAAACGACGGCCAGT                                               |
| M13-R           | CAGGAAACAGCTATGAC                                               |
| QSJD-F          | CAATAGCGAGTTCCAGAACT                                            |
| QSJD-R          | AGATGATGCGTGTGCGCGAC                                            |

Table S3. Primers used for qPCR analysis.

| Name             | Sequences                 |
|------------------|---------------------------|
| <i>β-actin</i>   | CACCACACCTTCTACAATGA      |
| NM_007393.5      | GTCTCAAACATGATCTGGGT      |
| <i>NLRP3</i>     | GAGTCTAGCAGACCTGATTG      |
| KF032621.1       | TTGTAGCTCATCAAAGCCAT      |
| <i>ASC</i>       | GCTCTTGAAAAGTGTGTCAGG     |
| AB059327.1       | CATGTCTCTAAGCACAGTCA      |
| <i>Caspase-1</i> | GTACACGTCTTGCCCTCATT      |
| NM_009807.2      | TCACGGTATACCCCAGATCC      |
| <i>IL-1β</i>     | GTGATATTCTCCATGAGCTTTGTAC |
| NM_008361.4      | CATTACACAGGACAGGTATAGATTC |
| <i>IL-18</i>     | TGTCTACCCTCTCCTGTAAG      |
| NM_008360.2      | AAGCAAGAAAGTGTCTCTCA      |
| <i>GSDMD</i>     | TGACAGTTCCAGTGCCT         |
| NM_026960.4      | CCTCGGTCACCACAAAC         |

Table S4. Docking scores and confidence scores.

| Rank             | 1       | 2       | 3       | 4       | 5       | 6       | 7       | 8       | 9       | 10      |
|------------------|---------|---------|---------|---------|---------|---------|---------|---------|---------|---------|
| Docking Score    | -266.70 | -264.71 | -260.41 | -258.40 | -253.89 | -253.57 | -230.70 | -228.65 | -224.58 | -223.83 |
| Confidence Score | 0.9117  | 0.9084  | 0.9010  | 0.8973  | 0.8887  | 0.8881  | 0.8340  | 0.8282  | 0.8163  | 0.8141  |
| Ligand rmsd (Å)  | 87.10   | 107.29  | 92.66   | 102.68  | 102.67  | 93.32   | 119.23  | 121.56  | 94.18   | 137.16  |

Table S5. Reaction system and procedure for qPCR analysis.

| constituents                  | reaction system | temperature | time   |             |
|-------------------------------|-----------------|-------------|--------|-------------|
| SYBR Premix Ex Taq II         | 10.0 µl         | 37°C        | 10 min | } 10 cycles |
| Forward/Reverse Primer (10µM) | 0.8 µl          | 16°C        | 10 min |             |
| Template cDNA                 | 2.0 µl          | 50°C        | 5 min  |             |
| dH2O                          | 6.4 µl          | 65°C        | 20 min |             |
| Total                         | up to 20 µL     | 4°C         | ∞      |             |
